# Supplementary material for: Cell surface GRP78 regulates TGFβ1-mediated profibrotic responses via TSP1 in diabetic kidney disease
Source: Frontiers journal article supplement (doi:10.3389/fphar.2023.1098321), 2023-02-24
Supplement: Image_1.pdf [file Image_1.pdf]

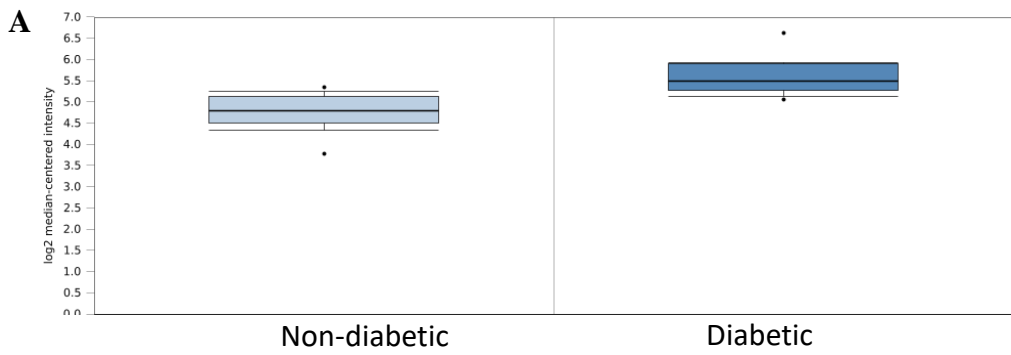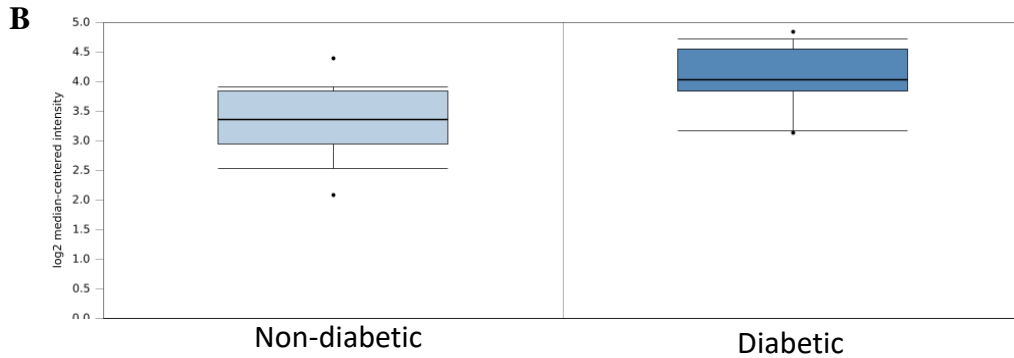

**Supplementary Figure 1: NephroSeq data shows increased  $\alpha$ 2M expression in glomeruli and the tubulointerstitium in DKD.** (A)  $\alpha$ 2M RNA expression was significantly increased in glomeruli from human DKD patients compared to healthy living donors (n=21 for control patients and 12 for DKD patients, \*\*\*\*p< 0.0001). (B) Increased  $\alpha$ 2M transcript expression was observed in the tubulointerstitium of DKD patients compared to healthy controls (n=31 for control patients and 17 for DKD patients, \*\*\*\*p< 0.0001).
